# Supplementary material for: Rapid Identification of Pathogenic Variants in Two Cases of Charcot-Marie-Tooth Disease by Gene-Panel Sequencing
Source: MDPI journal article supplement (doi:10.3390/ijms18040770), 2017-04-05

## Supplementary material II

### Manual verification of shortlisted variant calls

#### Case 1

1. **chr1:156109095\_156109095delA (likely sequencing error / miscalled variant)**  
*LMNA*:NM\_170707:cDNA.2405\_2405delA

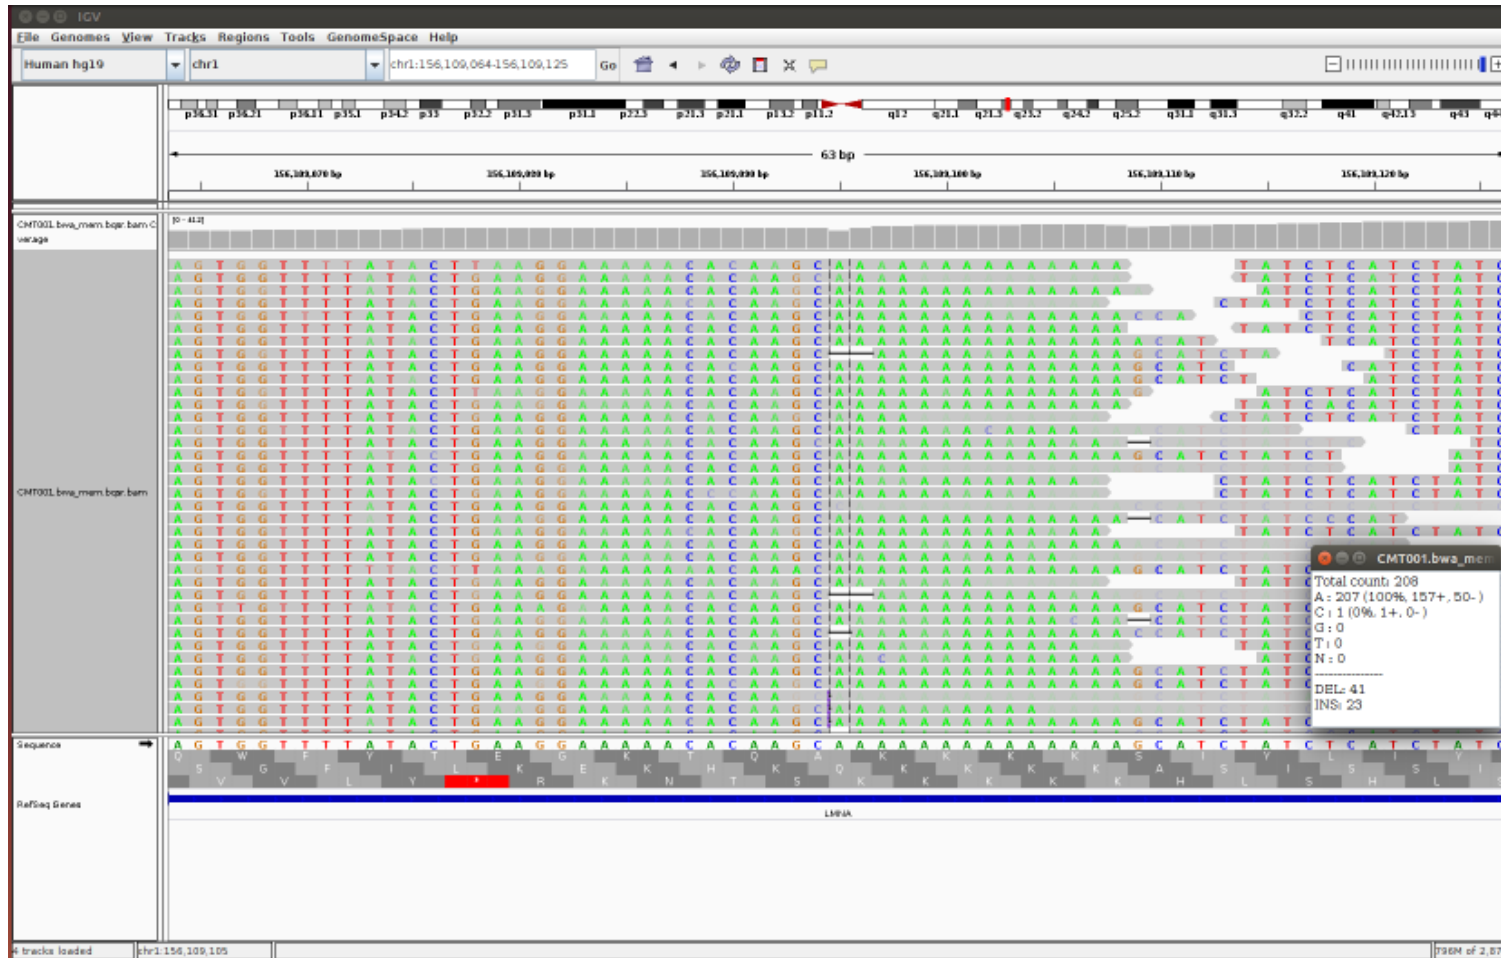

2. chr7:75932279G>A [Homozygous]  
HSPB1:NM\_001540:c.G250A(p.G84R)

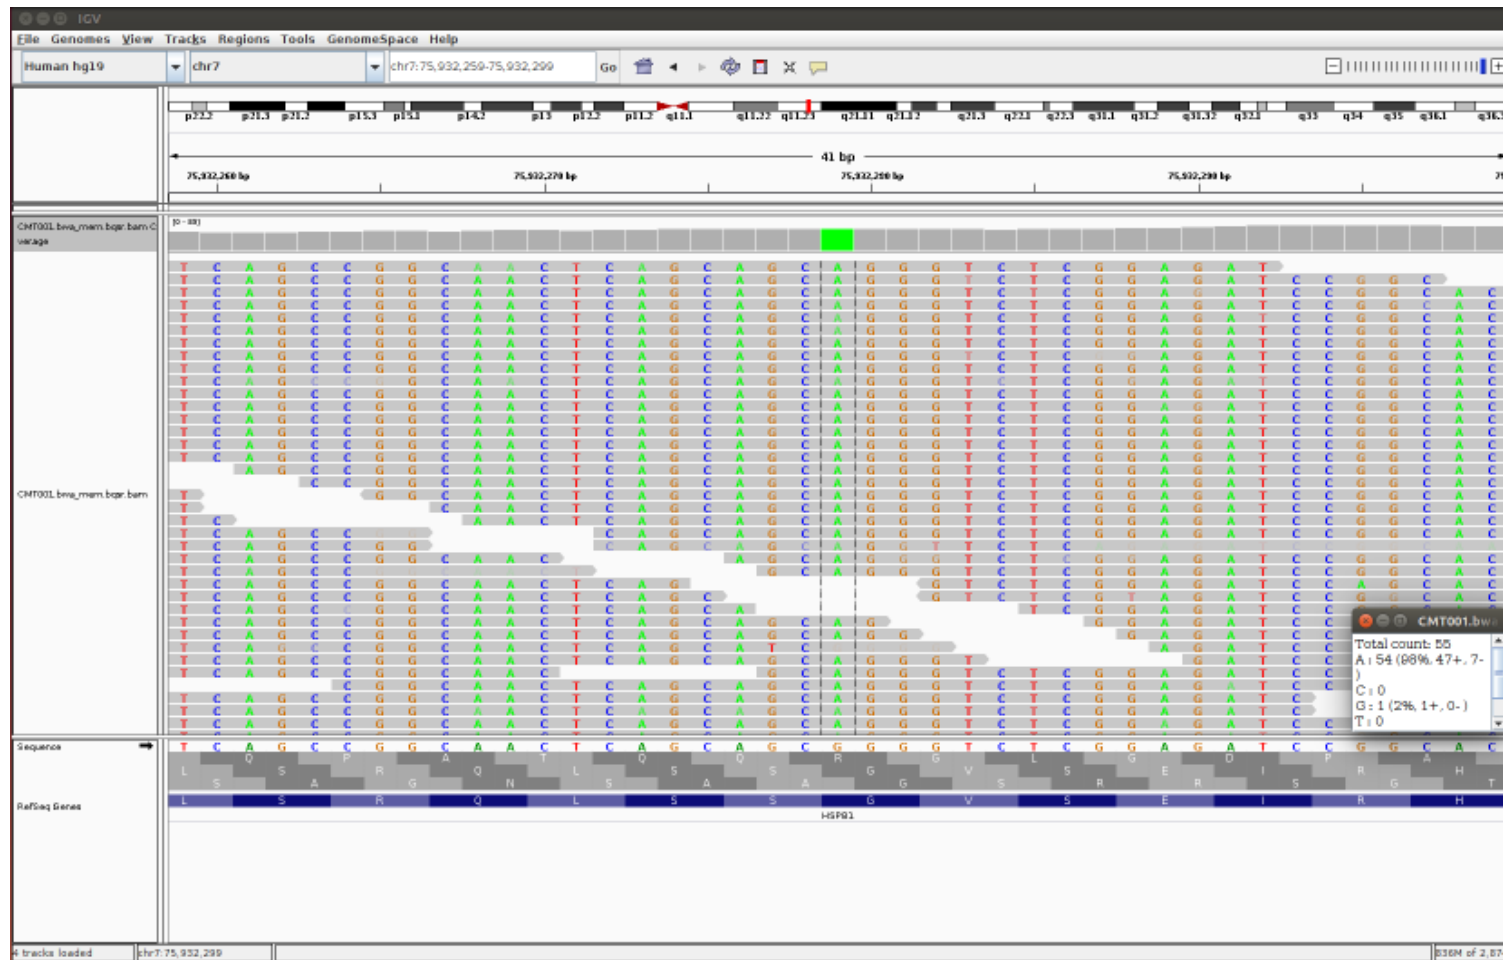

3. chr11:9861208G>C [Heterozygous]  
SBF2:NM\_030962:c.C3292G(p.L1098V)

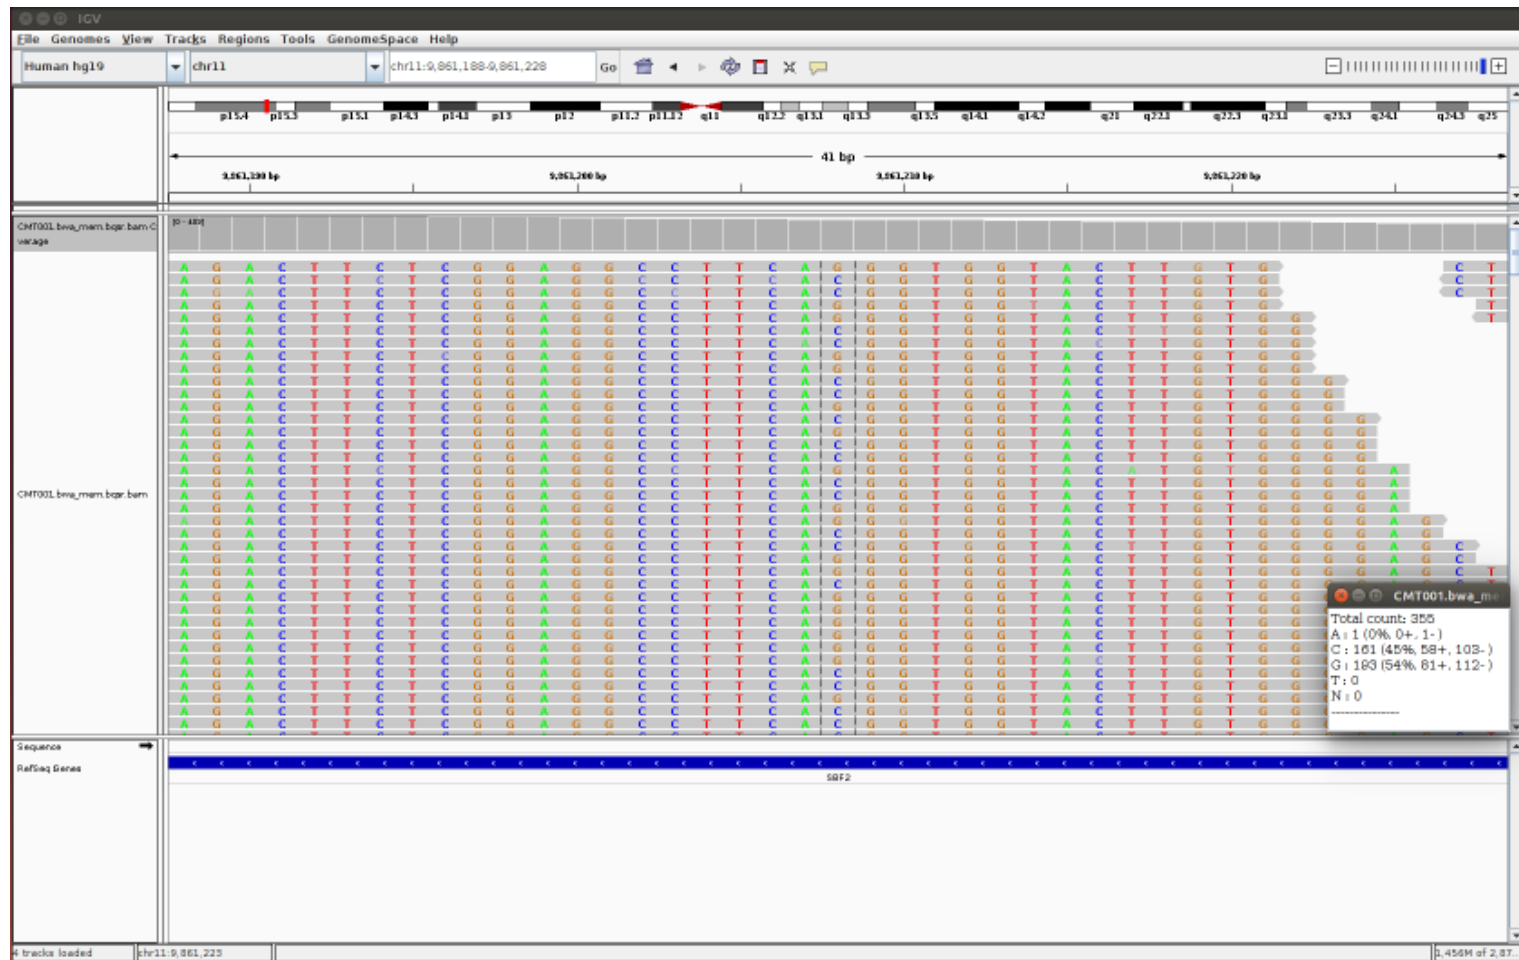

4. chr11:95595177A>G [Heterozygous]  
MTMR2:NM\_016156:c.T447C(p.Y149Y)

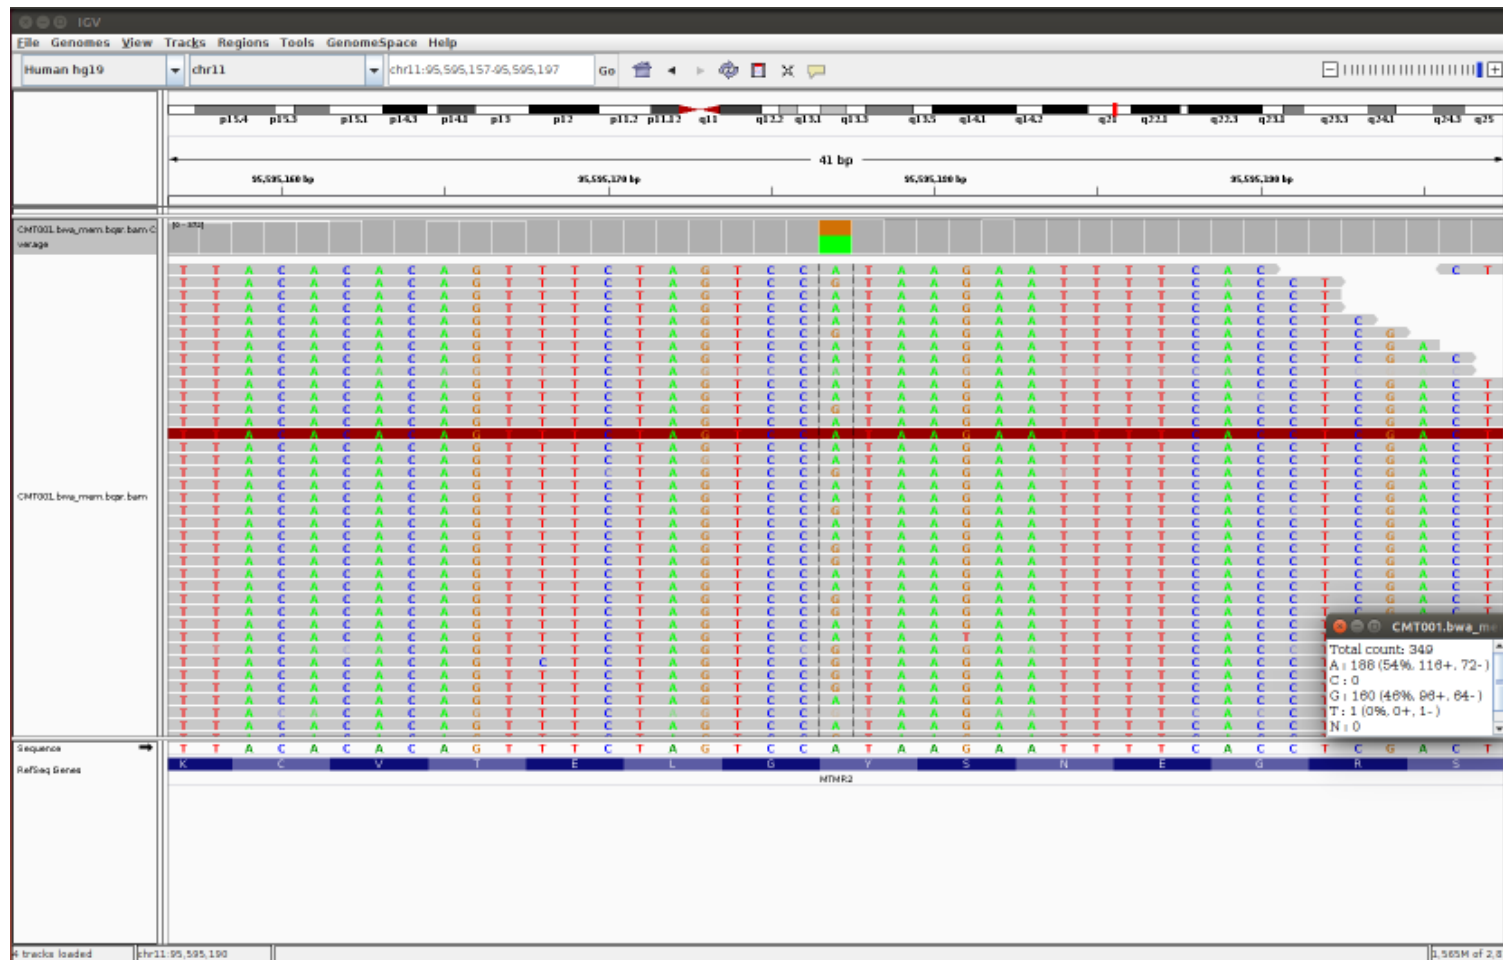

**1. chr1:10342522G>A [Heterozygous]**  
*KIF1B*:NM\_015074:c.G1227A:p.T409T

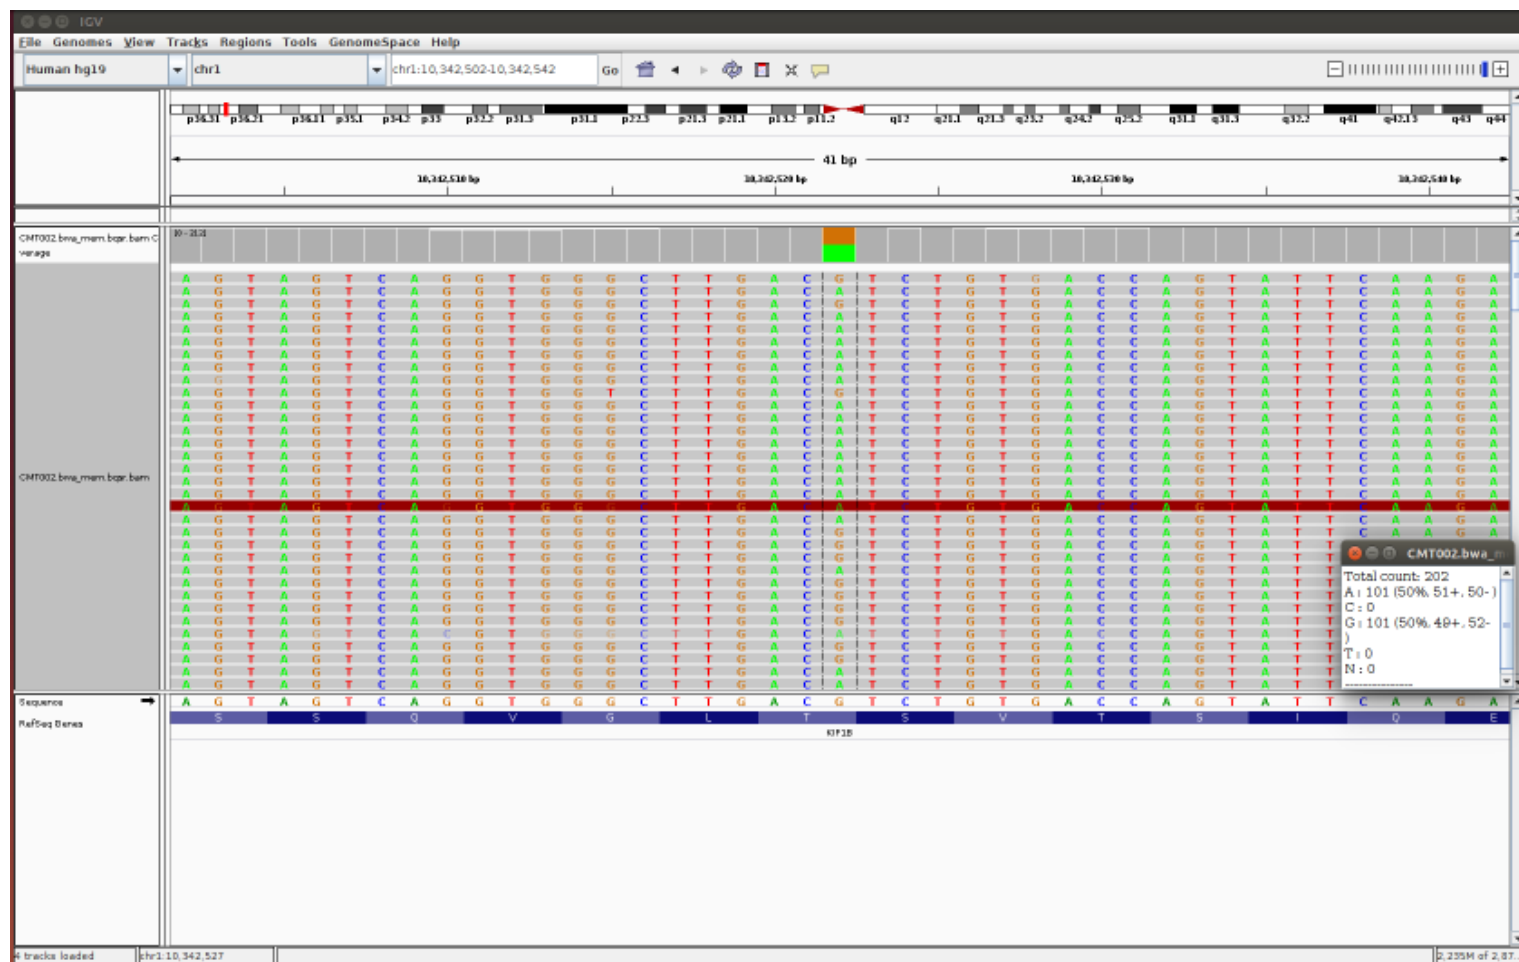

## 2. chr1:10397567A>G [Heterozygous] KIF1B:NM\_015074:c.A3260G:p.Y1087C

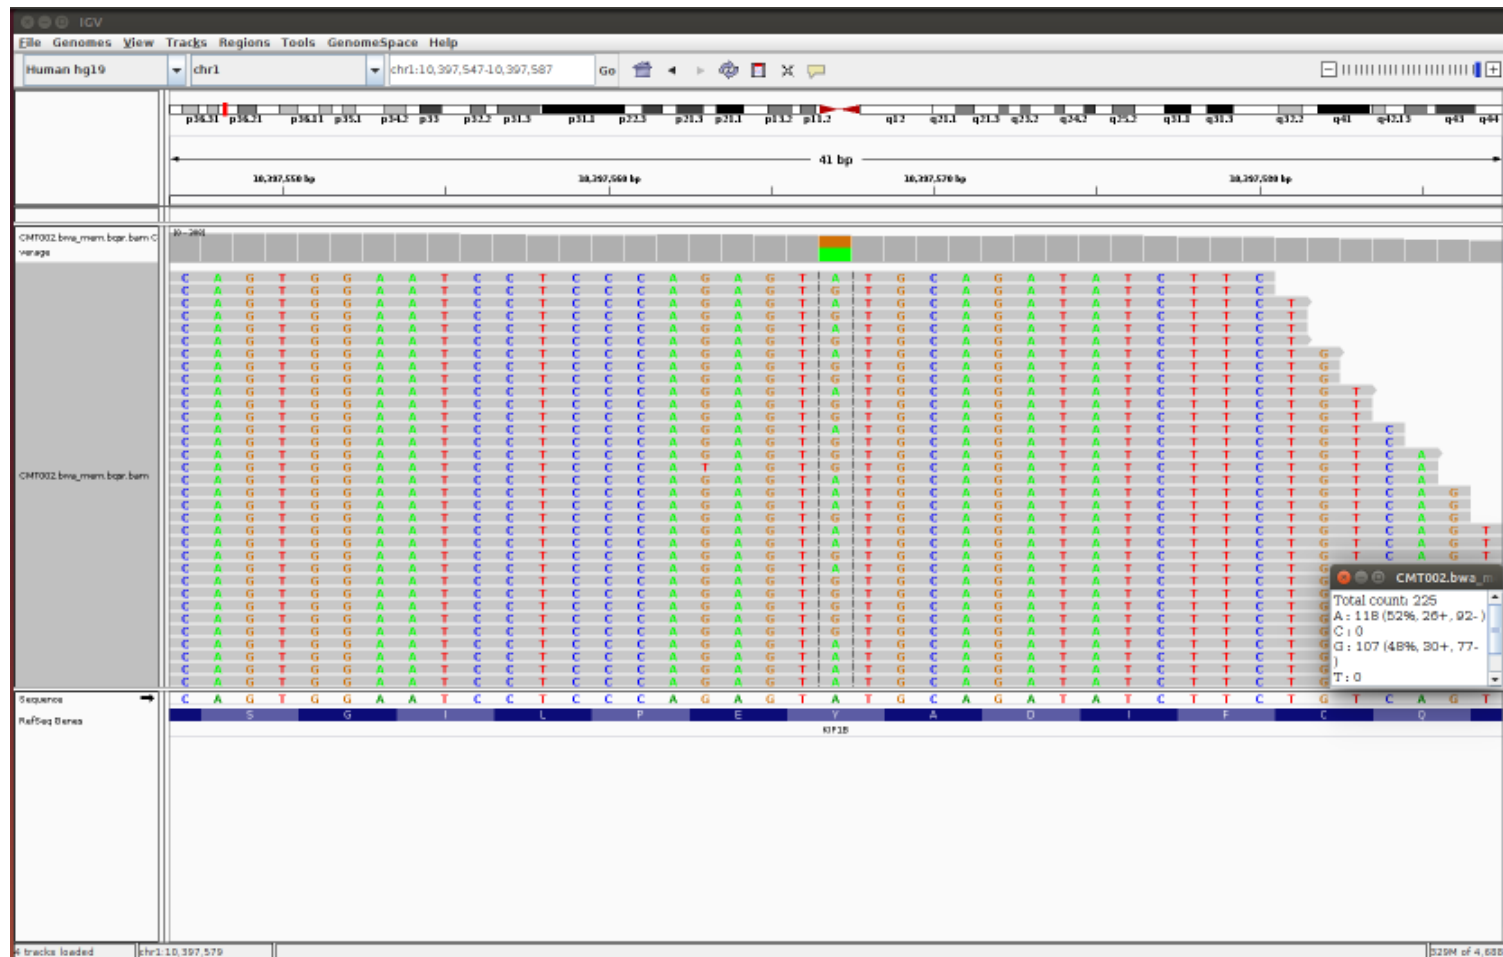

3. chr1:156109095\_156109095delA (likely sequencing error / miscalled variant)  
 LMNA: NM\_170707:cDNA.2405\_2405delA

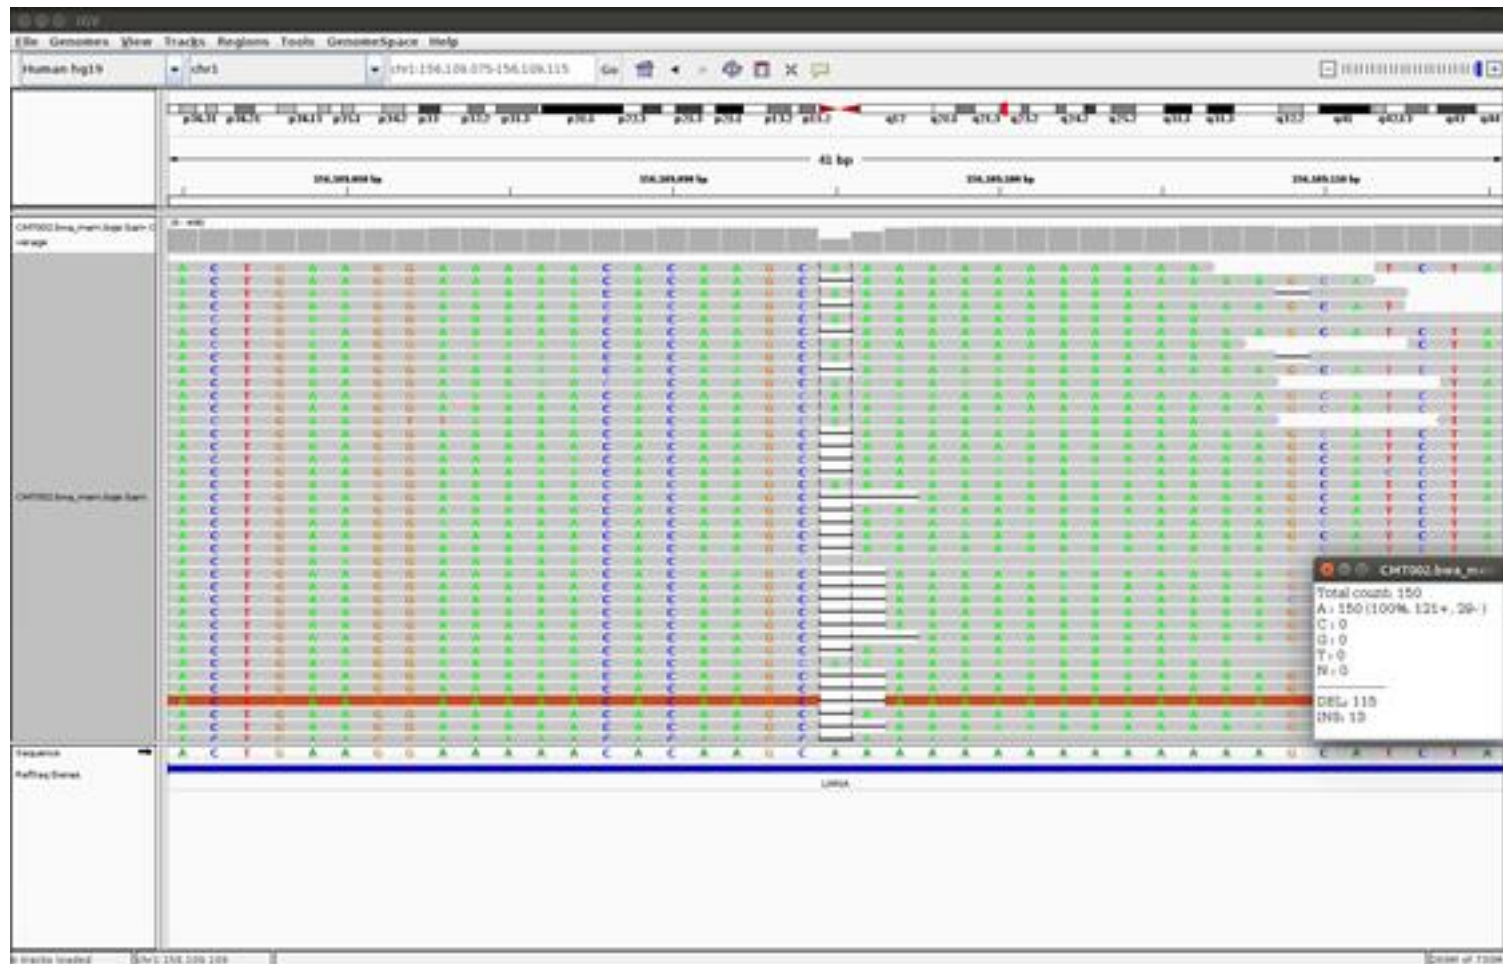



4. chr8:75272419C>T [Heterozygous]  
*GDAP1*:NM\_018972:c.C358T;p.R120W

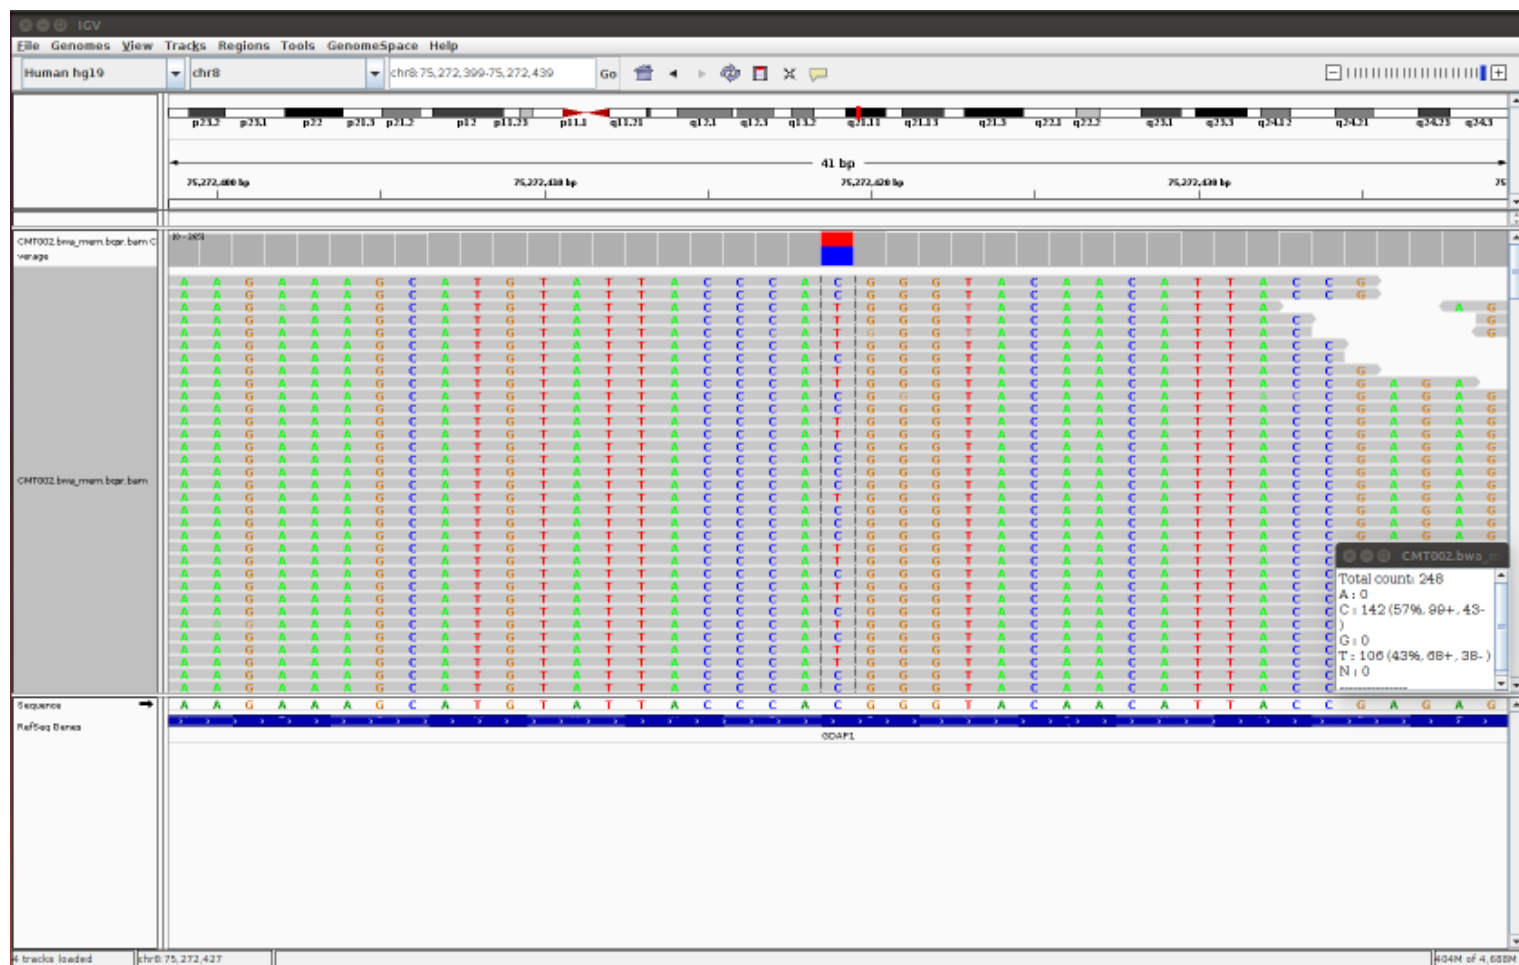



5. chr11:9990017G>A [Heterozygous]  
*SBF2*:NM\_030962:c.C1471T:p.L491F

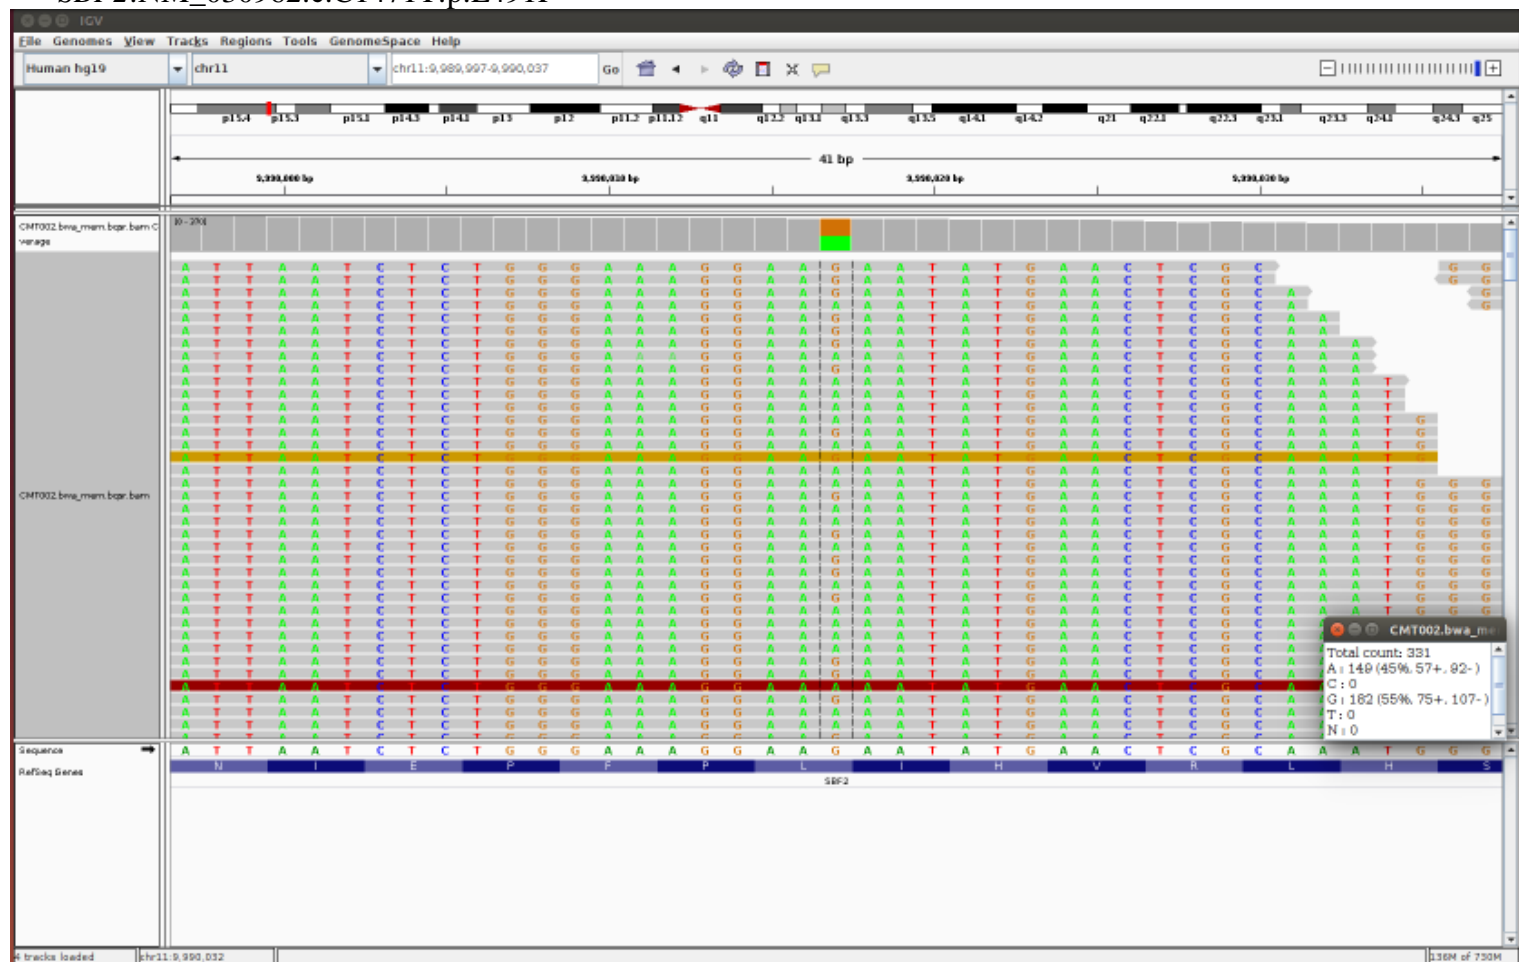

Supplement: s1 [file s1]
