# Supplementary material for: Rapid Identification of Pathogenic Variants in Two Cases of Charcot-Marie-Tooth Disease by Gene-Panel Sequencing
Source: MDPI journal article supplement (doi:10.3390/ijms18040770), 2017-04-05
Supplement: s1 [file s1]

## Supplementary material I

### Validation of variant-calling pipeline using NIST Genome in a Bottle data

| VCF                                           | BED               | Reference                                     | SNV Recall | SNV Precision | Indel Recall | Indel Precision |
|-----------------------------------------------|-------------------|-----------------------------------------------|------------|---------------|--------------|-----------------|
| [1] ILMN-GIAB.hc.raw.vcf-36719704             | TruSeq Exome v1.2 | NA12878 NIST Genome in a Bottle v3.2.2 (hg19) | 96.57%     | 99.11%        | 89.12%       | 92.64%          |
| [2] ILMN-GIAB.snp.filtered.vcf-36719704       | TruSeq Exome v1.2 | NA12878 NIST Genome in a Bottle v3.2.2 (hg19) | 96.37%     | 99.45%        | 89.12%       | 92.64%          |
| [3] ILMN-GIAB.snp_indel.filtered.vcf-36719704 | TruSeq Exome v1.2 | NA12878 NIST Genome in a Bottle v3.2.2 (hg19) | 96.37%     | 99.45%        | 85.78%       | 93.41%          |

Validation of local variant-calling pipeline was performed using NIST Genome in a Bottle dataset provided by Illumina. Briefly, FASTQ data was downloaded from the BaseSpace website (<https://basespace.illumina.com/analyses/36605989?projectId=25504495>). The FASTQ files downloaded were processed as with actual clinical samples. The variants called were either passed raw [1] or after filtering by VQSR of SNPs [2] or additionally with indel filtering by VQSR [3], to the BaseSpace website for validation. Recall and percentage percentages were calculated using the Variant Calling Assessment Tool (v3.0). The values in section 4.3 of the case report represent the unfiltered, raw output from HaplotypeCaller (GATK, Broad Institute, U.S.A.) to simulate the experimental conditions.
